# Supplementary material for: Unprofessional peer reviews disproportionately harm underrepresented groups in STEM
Source: PubMed Central journal article supplement (PMC6911688; doi:10.7717/peerj.8247), 2019-12-12
Supplement: peerj-07-8247-s001.pdf [file peerj-07-8247-s001.pdf]

**Unprofessional peer reviews disproportionately harm underrepresented groups in STEM**  
 Nyssa J Silbiger<sup>1\*</sup> and Amber D Stubler<sup>2\*</sup>

**Supplemental Tables and Figures**

**Table S1: Breakdown of raw data for each gender for each of the three models: a) scientific aptitude, b) productivity, and c) career advancement.** Values are the raw counts for each category (1-5).

|                            | <b>1</b>   | <b>2</b>   | <b>3</b>   | <b>4</b>   | <b>5</b>  | <b>Grand Total</b> |
|----------------------------|------------|------------|------------|------------|-----------|--------------------|
| <b>Scientific Aptitude</b> |            |            |            |            |           |                    |
| Men                        | 97         | 59         | 34         | 33         | 24        | <b>247</b>         |
| Non-binary                 | 1          | 1          | 1          | 1          | 0         | <b>4</b>           |
| Women                      | 73         | 63         | 95         | 80         | 55        | <b>366</b>         |
| <b>Grand Total</b>         | <b>171</b> | <b>123</b> | <b>130</b> | <b>114</b> | <b>79</b> | <b>617</b>         |
| <b>Productivity</b>        |            |            |            |            |           |                    |
| Men                        | 89         | 54         | 46         | 35         | 25        | <b>249</b>         |
| Non-binary                 | 0          | 0          | 0          | 3          | 1         | <b>4</b>           |
| Women                      | 63         | 79         | 110        | 70         | 45        | <b>367</b>         |
| <b>Grand Total</b>         | <b>152</b> | <b>133</b> | <b>156</b> | <b>108</b> | <b>71</b> | <b>620</b>         |
| <b>Career Advancement</b>  |            |            |            |            |           |                    |
| Men                        | 124        | 40         | 43         | 22         | 19        | <b>248</b>         |
| Non-binary                 | 2          | 0          | 1          | 0          | 1         | <b>4</b>           |
| Women                      | 124        | 91         | 63         | 47         | 41        | <b>366</b>         |
| <b>Grand Total</b>         | <b>250</b> | <b>131</b> | <b>107</b> | <b>69</b>  | <b>61</b> | <b>618</b>         |

### Gender

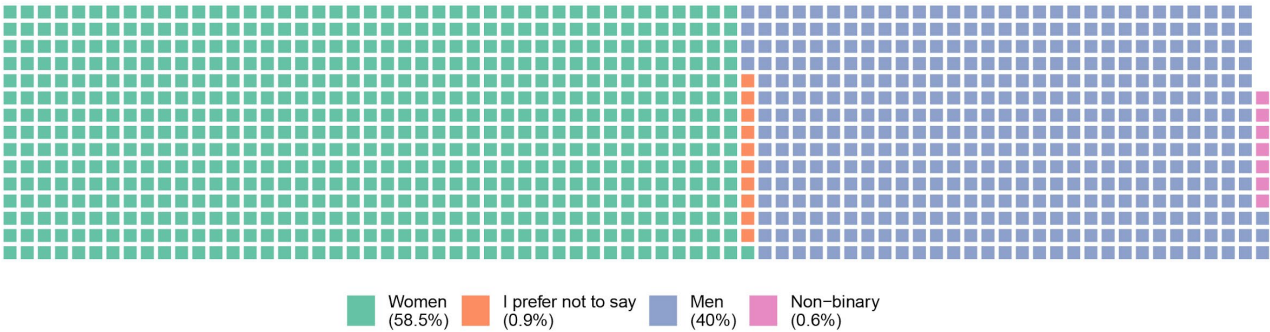

### Race and Ethnic Categories

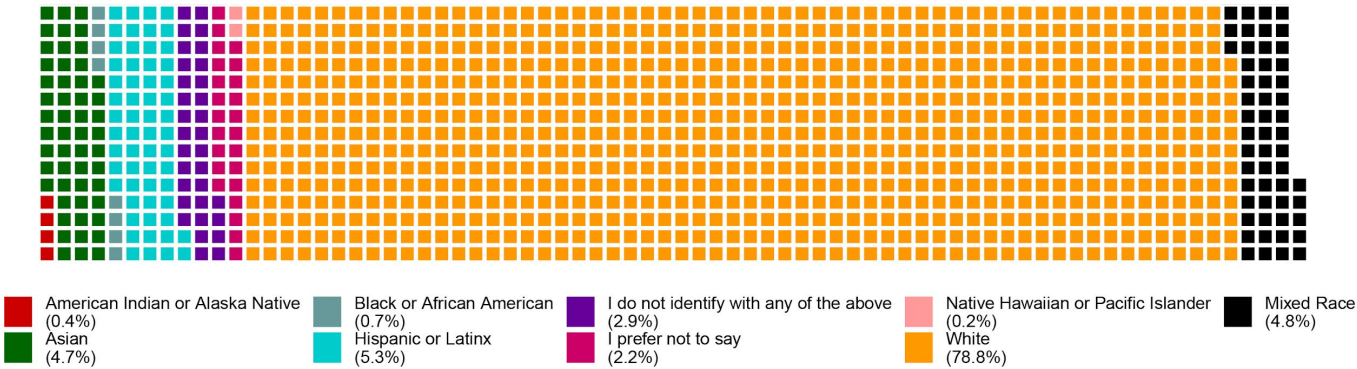

**Figure S1: Percentage of all respondents by gender and race/ethnicity for all categories in the survey.**

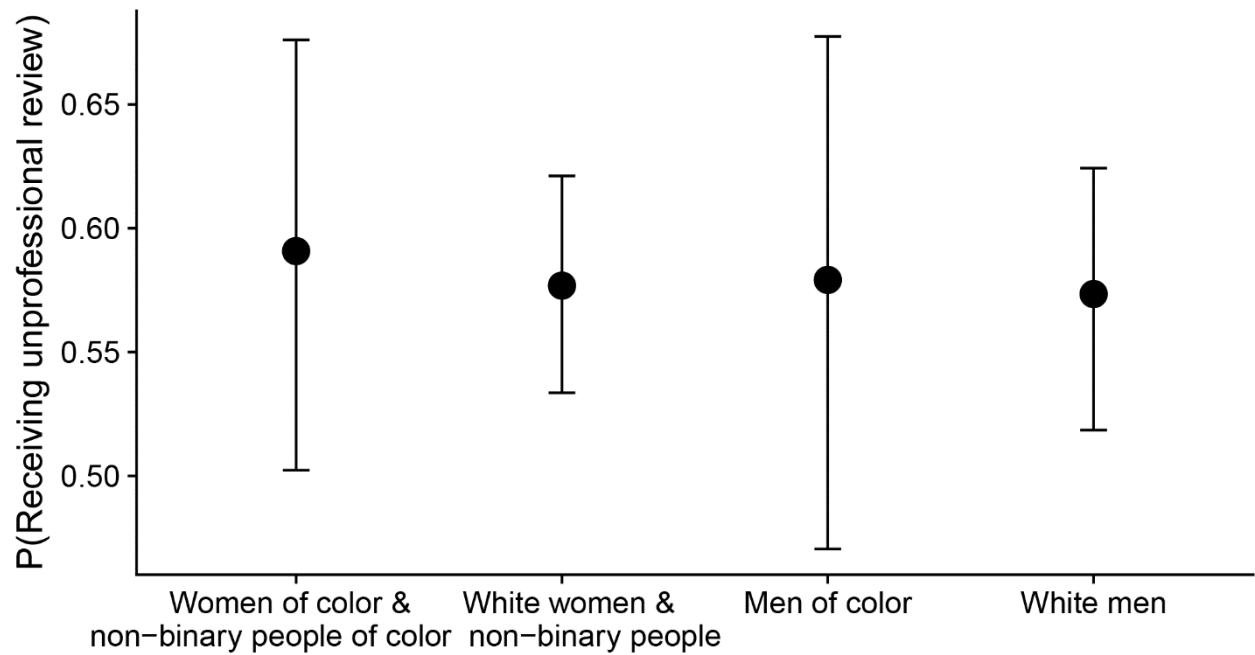

**Figure S2: Results from Bayesian logistic regression showing the probability of receiving an unprofessional peer review by intersectional groups.** Symbols are medians  $\pm$  95% BCI. There is no significant difference in the probability of receiving an unprofessional review among these four groups.
